# Supplementary material for: SlNCED1 and SlCYP707A2: key genes involved in ABA metabolism during tomato fruit ripening
Source: PubMed Central journal article supplement (PMC4157709; doi:10.1093/jxb/eru288), 2014-07-19
Supplement: supp_eru288_jexbot120592_file001.pdf [file supp_eru288_jexbot120592_file001.pdf]

**SUPPLEMENTARY TABLE S1.** Specific primer sequences used for Real-time quantitative PCR

| Target gene       | Forward primer (5'-3')      | Reverse primer (5'-3')      |
|-------------------|-----------------------------|-----------------------------|
| <i>SISAND</i>     | TTGCTTGGAGGAACAGACG         | GCAAACAGAACCCCTGAATC        |
| <i>SINCED1</i>    | AGGCAACAGTGAAACTTCCATCAAG   | TCCATTAAAGAGGATATTACCGGGGAC |
| <i>SINCED2</i>    | TGGTTTTTCATGGGACATTCATTAGC  | ATCTCCCTTCTCAACTCCCTATTCC   |
| <i>SINCED3</i>    | AGGCAACAGTGAAACTTCCATCAAG   | CGGTTTGTATAACGGTTGGCGCCG    |
| <i>SIACS2</i>     | CTACGCAGCCACTGTCTTTGAC      | TGATTCCGACTCTAAATCCTGGTAA   |
| <i>SIACS4</i>     | TTGCGACGAAATATATGCTGCT      | CACTCGAAATCCTGGAAAACCT      |
| <i>SIACO1</i>     | ACTATCCACCATGTCCTAAGCCCG    | TCTGTTTGTGCAATTACTCTGTGCAGC |
| <i>SIETR1</i>     | ATGGATGAGAATGGTGTAGCAGGA    | CACAATAAGTGGCCTACCGTGACGT   |
| <i>SIETR3</i>     | AAGGGAACCACTGTCACGTTTGTAG   | TTAATGTTCTTTGTACACCAATGTCC  |
| <i>SIETR4</i>     | TGAGAATTCGGAAGTTTGGTAGCCA   | ACTCCACTCTATAAGGCACCGTCA    |
| <i>SIETR6</i>     | TTGATCATCGGTTTAGCTGCAATTACT | GTCTATTGTAAACGTTACCGTCATGGC |
| <i>SICTR1</i>     | ACATTTGGATTATGTCAGGCTTGCA   | TTGCTCAAACAATGGTTCAAAGAGG   |
| <i>SICTR3</i>     | CTGCAATCATGGATATGCTGAGACCA  | CGGAACAAAAGCCTGAAGTAAACAA   |
| <i>SICTR4</i>     | TTATTGAAGCTTGCTGGGTGAATGA   | GCCAAATACCAAGTGCAAATGTTTC   |
| <i>SIEN2</i>      | AAGTTCTTGGTGATGTCAGTTCCCC   | TCTACTATGCCCTGAAGACGGTTGAG  |
| <i>SIERF2</i>     | GAAAAGGGCTCCTCAGAGAGCATAT   | TTTCTTCTGCCAATTCAAGTGACGA   |
| <i>SICYP707A1</i> | CCCAGAGTTCTTTCCTGATCCACAA   | GAATGCCACTACCAGATCCTACCAC   |
| <i>SICYP707A2</i> | TCGAAAAAGGATACAATTCGATGCC   | CTGCAATTTGTTTCGTCAGTGAGTCC  |
| <i>SICYP707A3</i> | CTCATGTCCAGGCAATGAGTTAGCC   | GGAGCGAAGCTAGAATGAGAATCACC  |
| <i>SIGGPS</i>     | TGTCTTGCTGCCTGTGAACTTGTTGG  | TACACTTTATGATTCGTGCGCTTTCC  |
| <i>SIPDS</i>      | TGGTAGCGAATCAATGGGTCATAAGT  | ACCTGCACCAGCAATAACAATCTCC   |
| <i>SIPSY1</i>     | GGAGAAGATGCCAGAAGAGGAAGAGT  | ACAAGACCAAAGATGCCCATACAGG   |
| <i>SIPSY2</i>     | CGTTGTGGCGAAGTATGTGCAGAGTA  | TCCAGCCTTGCCCTCCACCTATCTAA  |
| <i>SIZDS</i>      | TGCATTGGCATCTCCAGATGATTACT  | ATGGGTCTTTACCAGGTCCTTCACG   |
| <i>SIBcyc</i>     | GTTCTGAAAGAAGTCATTGGGTAATG  | CATGCCAATAACGAGGTTCTAAGTCA  |
| <i>SIExp</i>      | AATCAAATGCGGTTTTAACTGGTCAAT | TCGATTTCTTTTCTAAGGTGAACAAC  |
| <i>SIXET16</i>    | GTGGGATGAACCTGTTATGTCCGAG   | TATGATTGCTCTGTGCTGGTGGTG    |
